# Supplementary material
Source: Springer Nature journal article supplement (https://www.springerprofessional.de/resource/supplementary/13638_2011_204_MOESM15_ESM.pdf/11897206)

Walsh

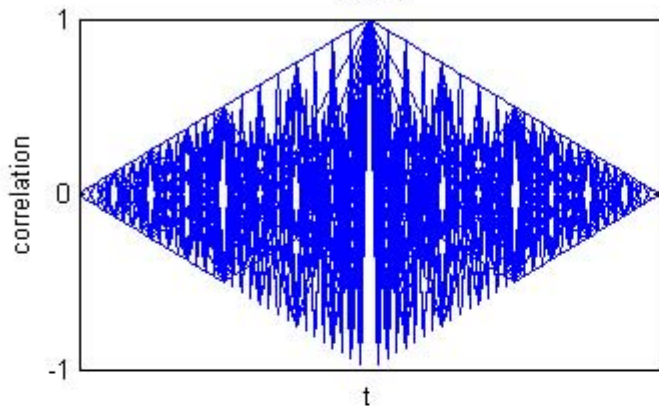

balanced

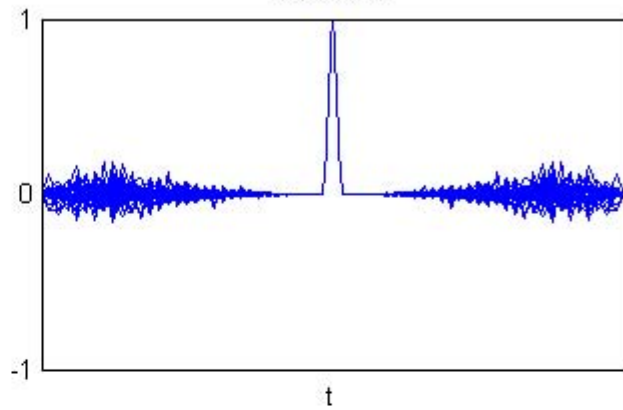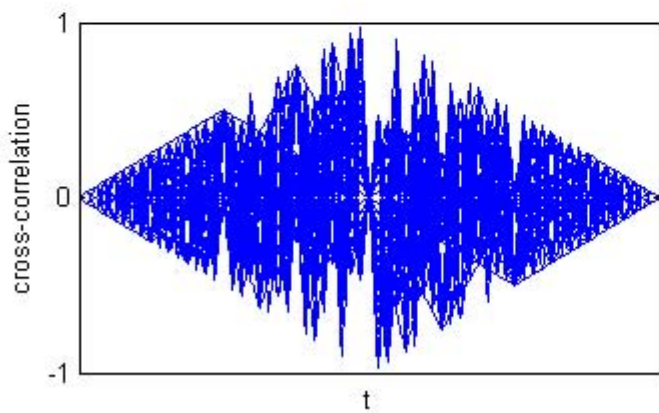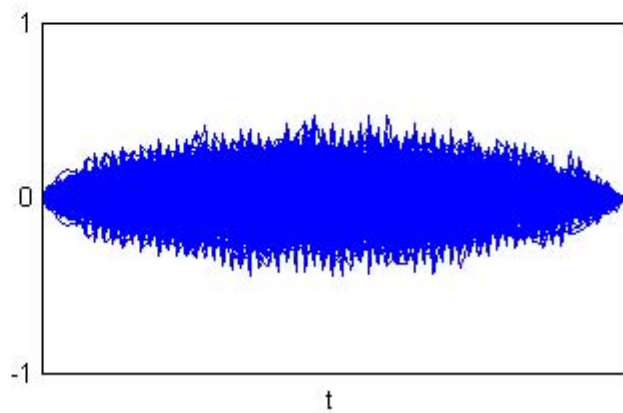

Supplement: MOESM15 [file 11897206]
